# Supplementary material
Source: Springer Nature journal article supplement (https://www.springermedizin.de/resource/supplementary/13034_2008_67_MOESM1_ESM.pdf/9652246)
Supplement: MOESM1 [file 9652246]

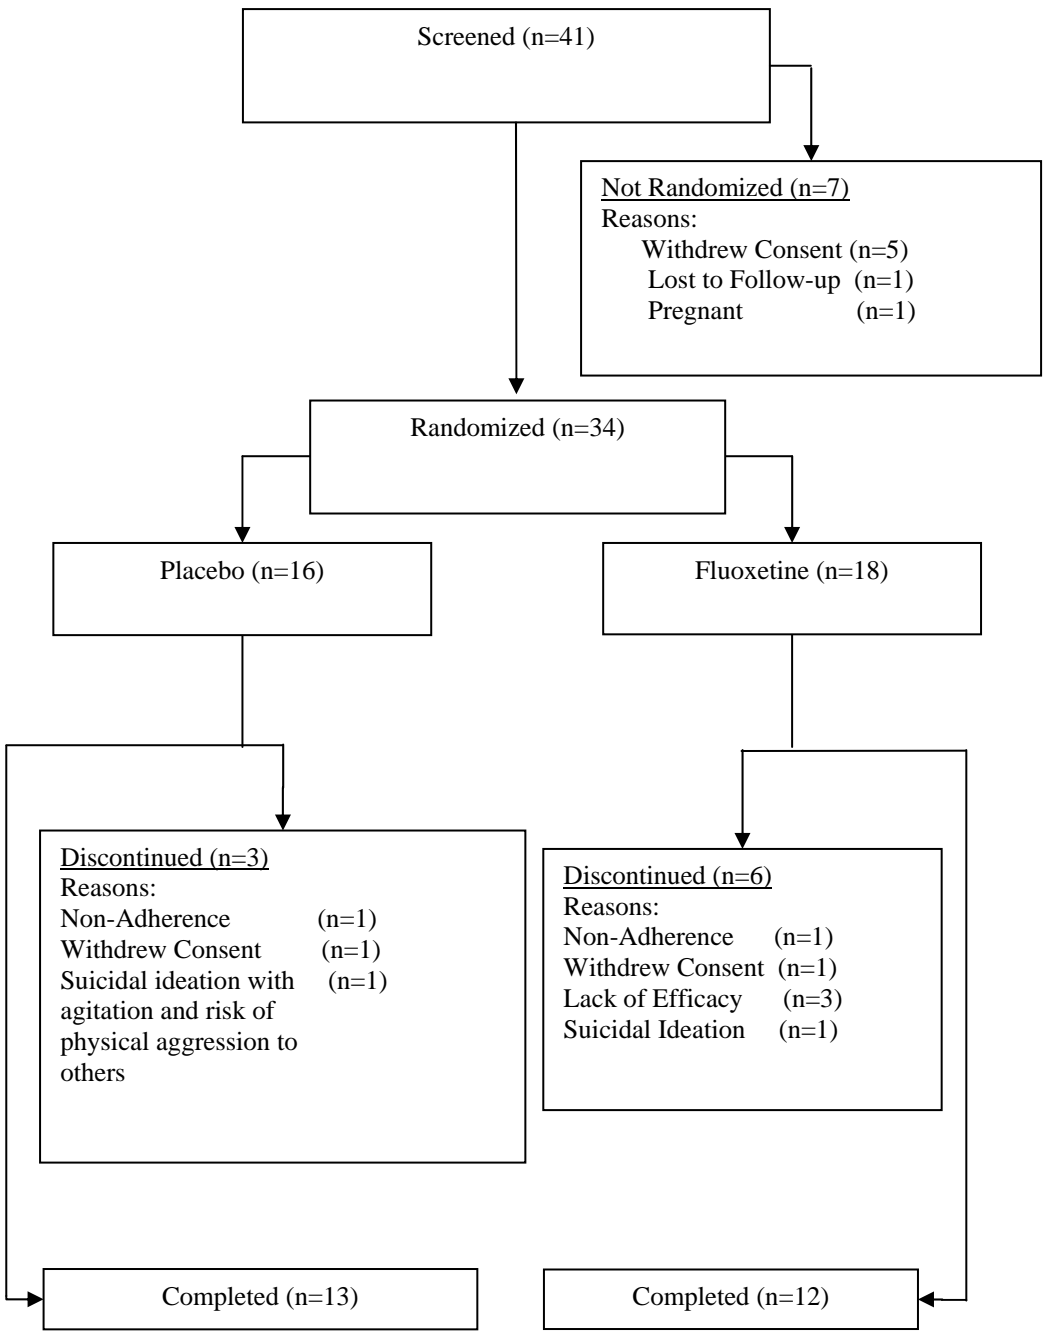

Screened (n=41)

Not Randomized (n=7)  
Reasons:  
Withdraw Consent (n=5)  
Lost to Follow-up (n=1)  
Pregnant (n=1)

Randomized (n=34)

Placebo (n=16)

Fluoxetine (n=18)

Discontinued (n=3)  
Reasons:  
Non-Adherence (n=1)  
Withdrawn Consent (n=1)  
Suicidal ideation with agitation and risk of physical aggression to others (n=1)

Discontinued (n=6)  
Reasons:  
Non-Adherence (n=1)  
Withdrawn Consent (n=1)  
Lack of Efficacy (n=3)  
Suicidal Ideation (n=1)

Completed (n=13)

Completed (n=12)
